# Supplementary material for: DEFB119 stratifies dysbiosis with distorted networks in the seminal microbiome associated with male infertility
Source: Research Square preprint supplement (doi:10.21203/rs.3.rs-2716767/v1), 2023-04-26
Supplement: Supplementary file 1 [file 980939735b44b4547a4e928d.xlsx]

## Sheet: Sheet1
	G1 - Normozoo, Normal DEFB119 (n=30)	G2 - Male-factor, Normal DEFB119 (n=52)	G3 - Male-factor, Elevated DEFB119 (n=5)	p value
Age, year	36.63 (35.68 - 37.59)	35.96 (34.94 - 36.98)	34.20 (29.20 - 39.20)	0.28
Partner age, year	39.93 (36.64 - 43.22)	39.25 (37.41 - 41.08)	35.80 (32.59 - 39.01)	0.29
Spermiogram	--	--
Semen volume, ml	2.94 (2.43 - 3.46)	2.61 (2.25 - 2.97)	4.26 (1.76 - 6.76)	0.09
		vs G1, 0.91	vs G1, 0.40
			vs G2, 0.11
Sperm concentration, millions/ml	65.17 (48.51 - 81.83)	37.56 (25.55 - 49.56)	11.58 (-2.62 - 25.78)	<0.0001
		vs G1, <0.001	vs G1, <0.01
			vs G2, 0.31
Total motility, %	55.41 (52.17 - 58.65)	46.00 (42.28 - 49.72)	43.00 (30.83 - 55.17)	<0.01
		vs G1, <0.05	vs G1, 0.07
			vs G2, 0.99
Progressive motility, %	50.96 (47.63 - 54.30)	40.12 (35.73 - 44.50)	37.00 (23.43 - 50.57)	<0.01
		vs G1, <0.01	vs G1, 0.06
			vs G2, 0.99
Morphology, %	7.57 (2.76 - 12.39)	2.19 (1.90 - 2.47)	1.52 (0.27 - 2.77)	<0.0001
		vs G1, <0.0001	vs G1, <0.0001
			vs G2, 0.97
Treatment	--	--	--
Convention IVF, n	24	21	1	N.A.
ICSI, n	5	32	4	N.A.
Fertilization rate, %	76.38 (69.67 - 83.09)	68.03 (60.61 - 75.44)	76.00 (47.41 - 104.60)	0.57
Good quality embryo rate, %	47.18 (28.20 - 66.16)	60.73 (47.89 - 73.57)	76.33 (-25.50 - 178.2)	0.33
DEFB119	--	--	--
Protein level in seminal plasma, ng/ml	291.30 (210.50 - 372.00)	393.60 (245.70 - 541.50)		0.22
		246.70 (197.10 - 296.30)	1951.00 (863.90 - 3039.00)	<0.001
		vs G1, 0.99	vs G1, <0.01
			vs G2, <0.001
