# Supplementary material for: DEFB119 stratifies dysbiosis with distorted networks in the seminal microbiome associated with male infertility
Source: Research Square preprint supplement (doi:10.21203/rs.3.rs-2716767/v1), 2023-04-26
Supplement: Supplementary file 1 [file ec083a59959835869df4e04f.pdf]

## **SUPPLEMENTAL FIGURE LEGENDS**

**Supplemental Fig. S1: Comparison on alpha diversity indices of seminal microbiome of normozoospermia and male-factor infertile patients.** (A-D) Alpha diversity analysis with indicated indices in normozoospermia and male-factor infertile patients.

**Supplementary Fig. S2: Comparison on beta diversity indices of seminal microbiome of normozoospermia and male-factor infertile patients.** (A-F) Principal component (A, C and E) analysis of the seminal microbiome in **normozoospermia and male-factor infertile patients**. (B, D and F) Beta diversity analysis with indicated indices in the two groups of patients.

**Supplemental Fig. S3: Comparison on alpha diversity indices of seminal microbiome of normozoospermia and male-factor infertile patients with varying levels of DEFB119.** (A-D) Alpha diversity analysis with indicated indices in the seminal microbiome of G1 (normozoospermia, normal DEFB119, n=30), G2 (male-infertility, normal DEFB119, n=52) and G3 (male-infertility, elevated DEFB119, n=5).

**Supplemental Fig. S4: Comparison on beta diversity indices of seminal microbiome of normozoospermia and male-factor infertile patients with varying levels of DEFB119.** (A-F) Principal component (A, C and E) analysis and (B, D and F) beta diversity analysis with indicated indices in the G1-3 groups.

**Supplementary Fig. S5: Bacterial groups distinguishing normozoospermia and male infertility patients with varying levels of DEFB119.** (A) Differential abundance analysis with **Wilcox test** showing the relative abundance of genera that distinguish in samples with elevated level of DEFB119 (G3) from those with normal levels (G1 & 2). \*  $p < 0.05$ .

**Supplementary Fig. S6: Correlation of DEFB119 with spermiogram parameters in normozoospermia and male-factor infertile patients.** Correlation analysis examining the

relationship between semen volume, indicated sperm parameters and DEFB119 level. \*  $p < 0.05$ ,  
\*\*  $p < 0.01$ , \*\*\*  $p < 0.001$ .

**Supplementary Table S1: Clinical characteristics of patients with normozoospermia and male-factor infertility.** Data represent mean  $\pm$  95% confidence interval.

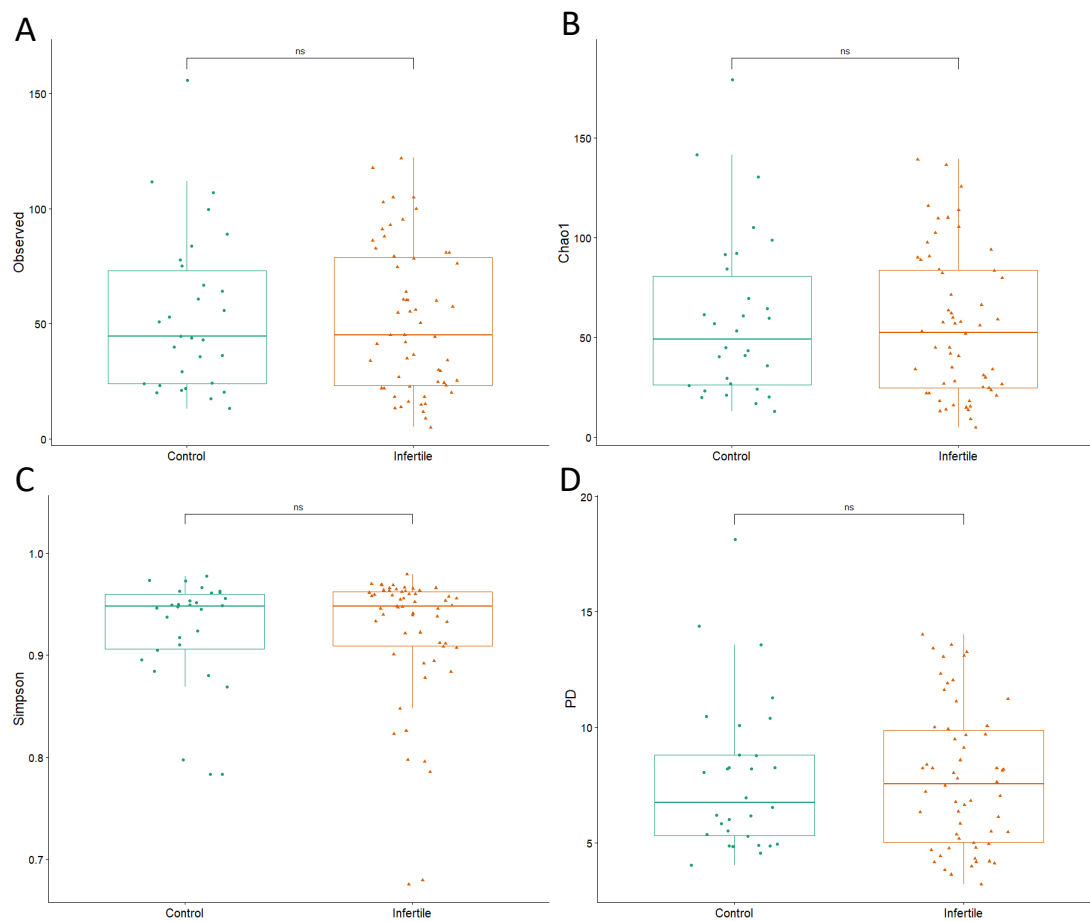

**Supplemental Fig. S1: Comparison on alpha diversity indices of seminal microbiome of normozoospermia and male-factor infertile patients.**

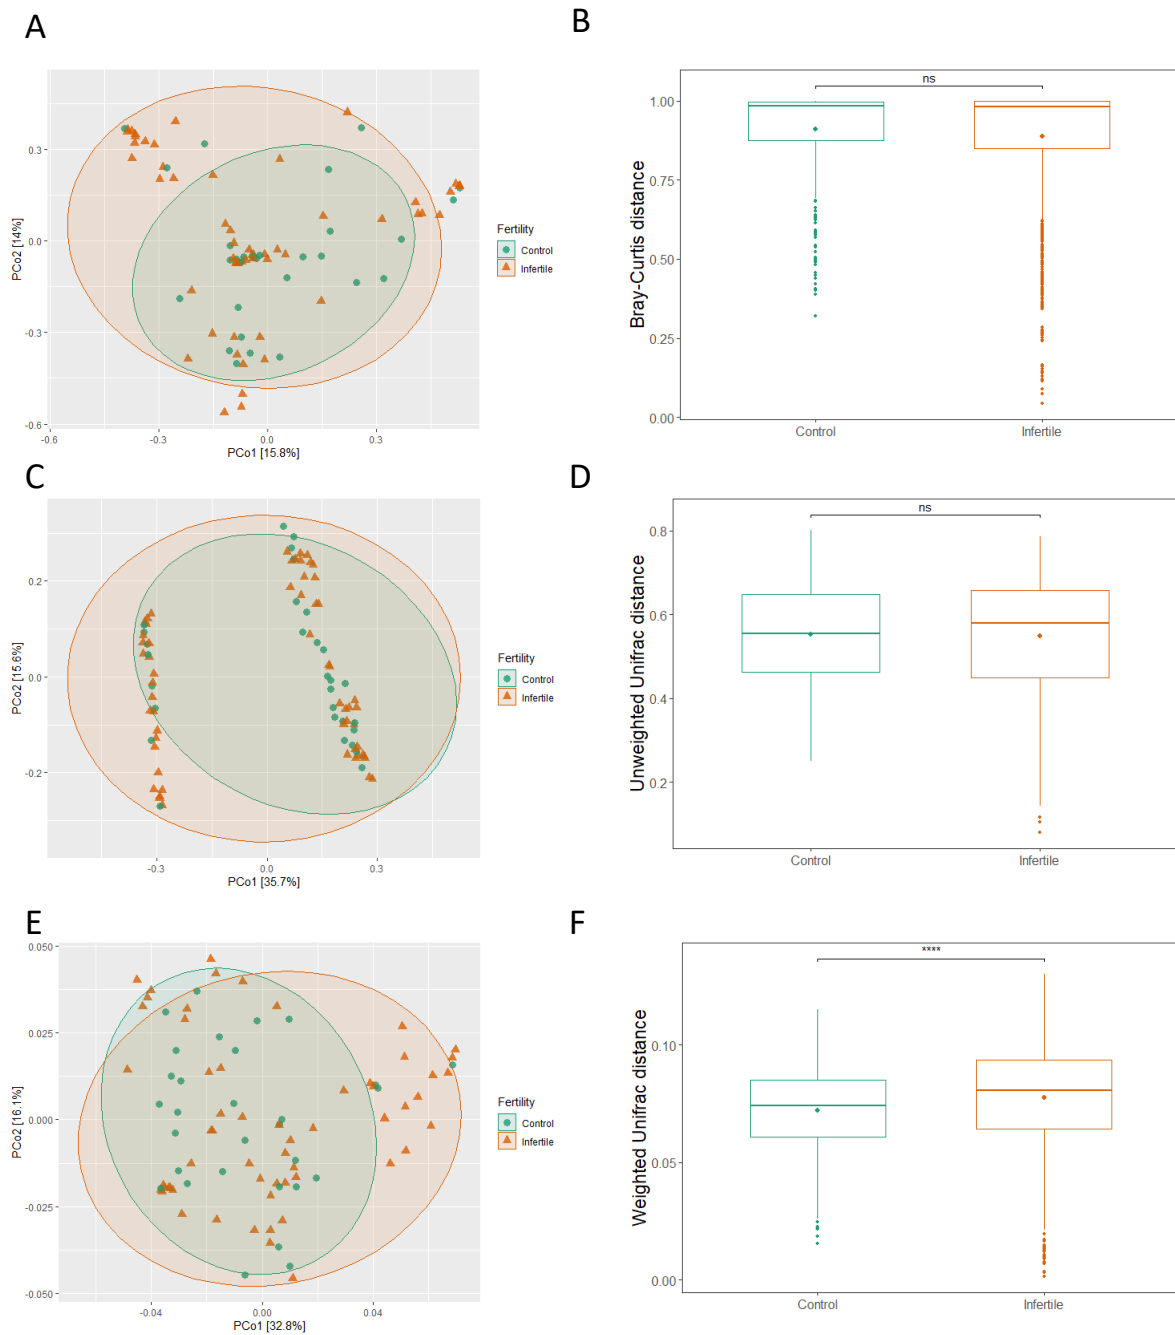

**Supplementary Fig. S2: Comparison on beta indices of seminal microbiome of normozoospermia and male-factor infertile patients.**

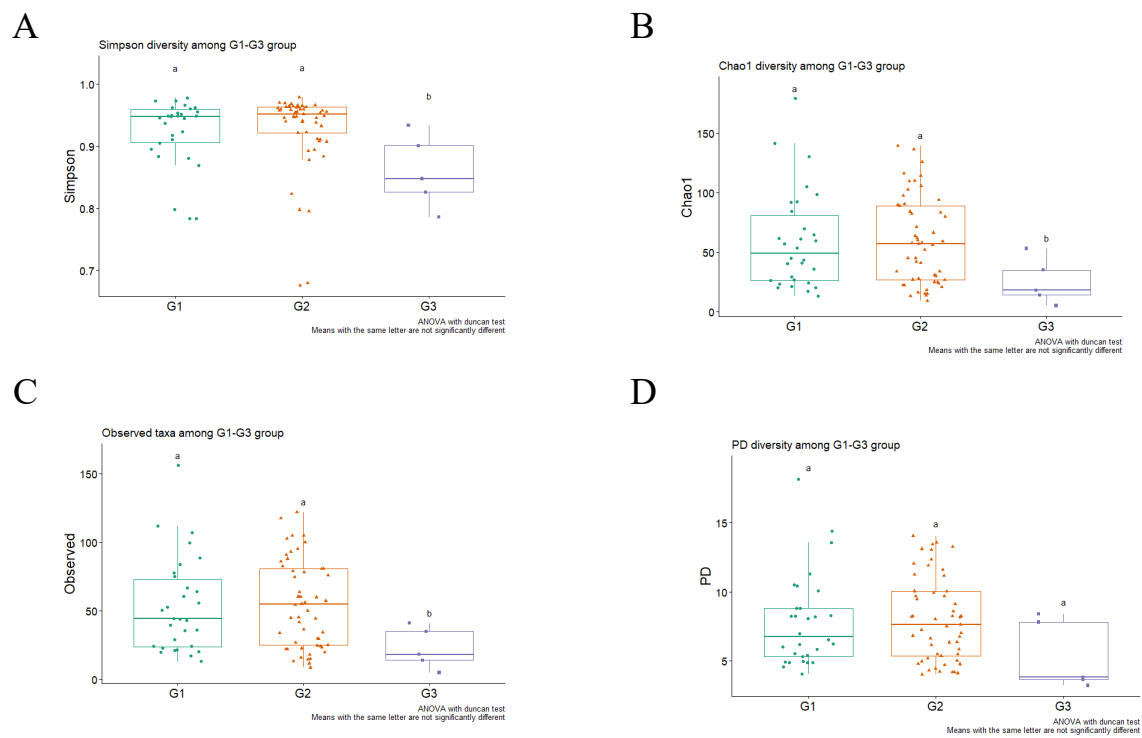

**Supplemental Fig. S3: Comparison on alpha diversity indices of seminal microbiome of normozoospermia and male-factor infertile patients with varying levels of DEFB119.**

A

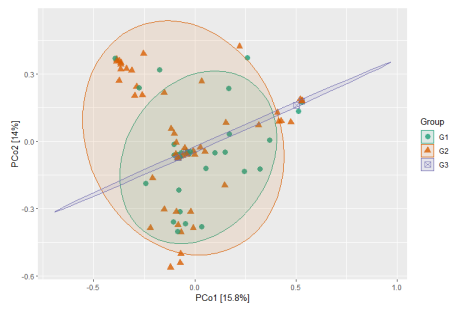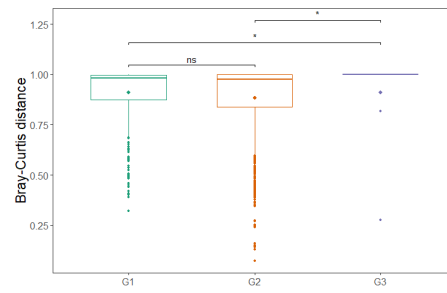

B

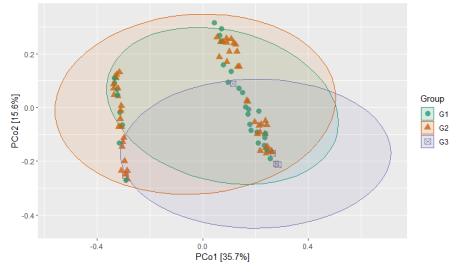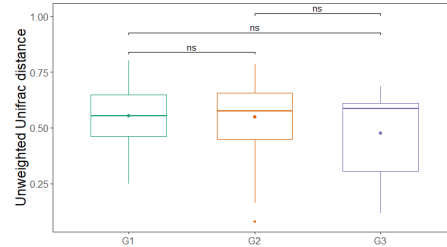

C

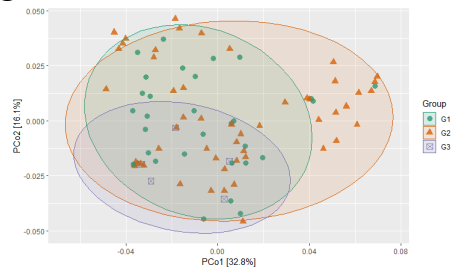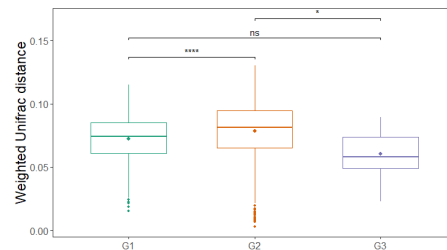

**Supplemental Fig. S4: Comparison on beta diversity indices of seminal microbiome of normozoospermia and male-factor infertile patients with varying levels of DEFB119.**

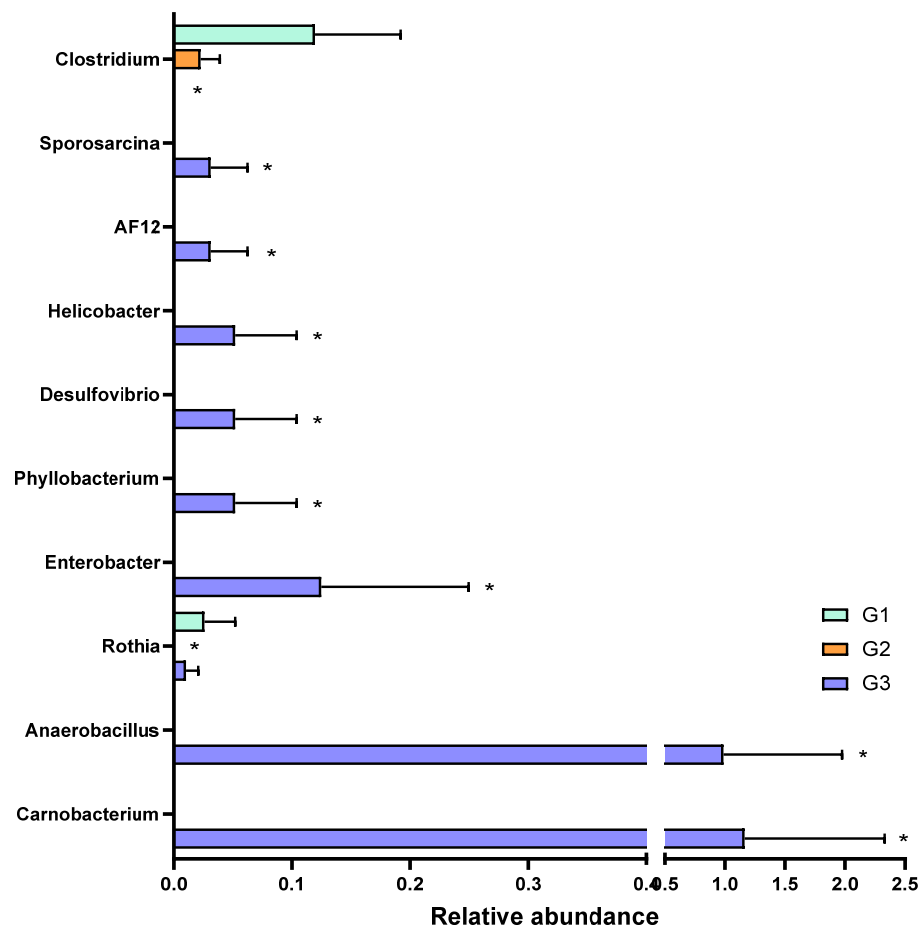

**Supplemental Fig. S5: Bacterial groups distinguishing normozoospermia and male infertility patients with varying levels of DEFB119.**

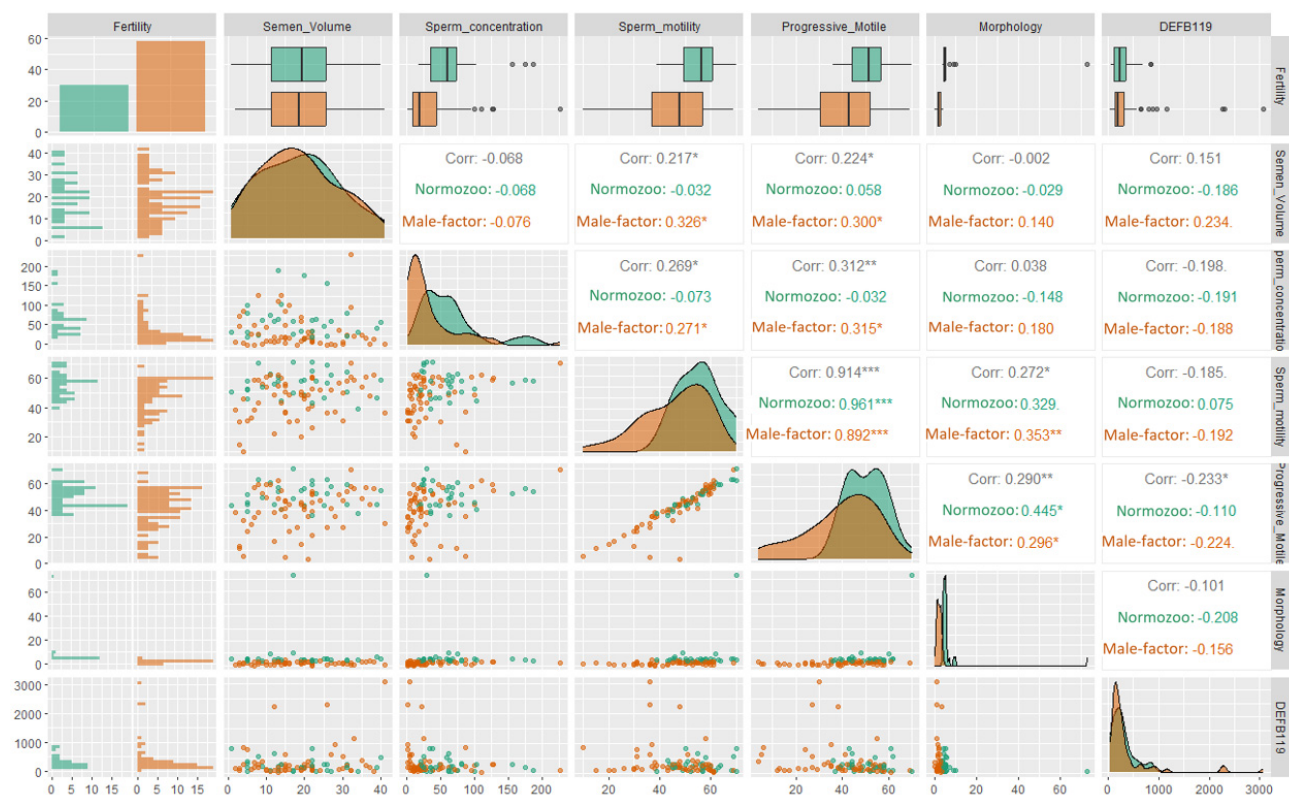

**Supplemental Fig. S6: Correlation of DEFB119 with spermiogram parameters in normozoospermia and male-factor infertile patients.**



|                                  | <b>Normozoospermia (n=30)</b> | <b>Male-factor infertility (n=58)</b> | <b>p value</b> |
|----------------------------------|-------------------------------|---------------------------------------|----------------|
| Age, year                        | 36.63 (35.68 to 37.59)        | 35.81 (34.83 - 36.79)                 | 0.21           |
| Partner age, year                | 39.93 (36.64 to 43.22)        | 38.95 (37.25 - 40.65)                 | 0.55           |
| Spermiogram                      | --                            | --                                    |                |
| Semen volume, ml                 | 2.94 (2.43 - 3.45)            | 2.76 (2.377 - 3.139)                  | 0.51           |
| Sperm concentration, millions/ml | 65.17 (48.51 - 81.83)         | 35.28 (24.16 - 46.40)                 | <0.0001        |
| Total motility, %                | 55.41 (52.17 - 58.65)         | 45.74 (42.27 - 49.20)                 | 0.0015         |
| Progressive motility, %          | 50.96 (47.63 - 54.30)         | 39.84 (35.77 - 43.92)                 | 0.001          |
| Morphology, %                    | 7.57 (2.75 - 12.39)           | 2.13 (1.85 - 2.40)                    | <0.0001        |
| Treatment                        | --                            | --                                    |                |
| Convention IVF, n                | 24                            | 21                                    | N.A.           |
| ICSI, n                          | 5                             | 36                                    | N.A.           |
| Fertilization rate, %            | 76.39 (69.67 - 83.09)         | 68.72 (61.76 - 75.69)                 | 0.34           |
| Good quality embryo rate, %      | 47.18 (28.20 - 66.16)         | 62.60 (50.21 - 74.99)                 | 0.18           |

**Supplementary Table S1: Clinical characteristics of patients with normozoospermia and male-factor infertility.**
